# Supplementary material
Source: PubMed Central journal article supplement (PMC8690900)
Supplement: 12879_2021_6960_MOESM1_ESM.pdf [file 12879_2021_6960_MOESM1_ESM.pdf]

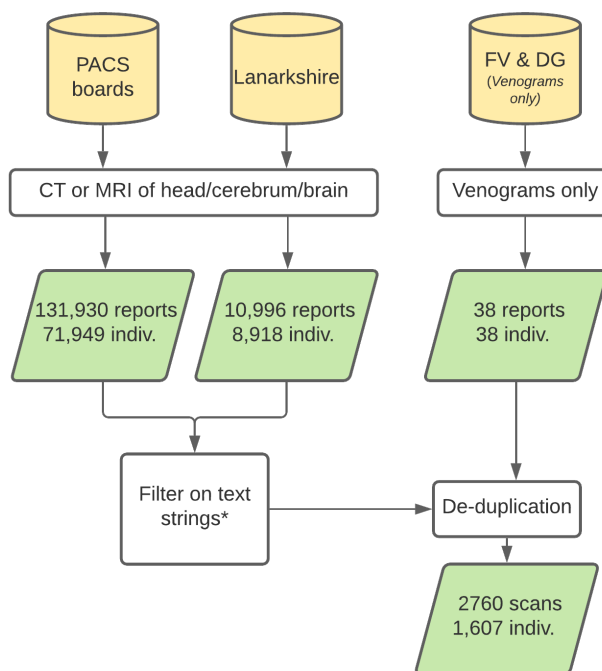

\* Retained all venograms as well as any reports containing any of the following text:- sinus thrombosis, sinus thrombus, venous thrombosis and/or venous thrombus.

**Fig S1.** Flow diagram for case ascertainment from scan reports

**PACS query for ascertainment of scans possibly informative for CVT** 467

- (Modality=CT OR Modality=MR) AND (Study description contains “head” or “cerebr\*” or “brain”) 468  
469

**OR** 470

- RIS code = ANY OF 471
  - CVENO CT Venogram 472
  - CVEIC CT Venogram Intracranial 473
  - CVECE CT Venogram cerebral 474
  - CTHVG CT Head Venogram 475
  - MVENO MRV Venogram 476
  - CBNTA CT Brain neck thorax Abdo and pelvis 477
  - CHAP CT Head abdomen and pelvis 478
  - CHAPC CT Head abdomen pelvis with contrast 479
  - CHNTAP CT Head neck thorax abdomen and pelvis 480
  - CHTA CT Head thorax and abdomen 481
  - CHTAP CT Head thorax abdomen and pelvis 482
  - CHTAPC CT Head thorax Abdo pelvis with contrast 483
  - CHTH CT Head and thorax 484
  - CHTHAC CT Head thorax abdomen with contrast 485
  - CHTHC CT Head and thorax with contrast 486
  - CSKNE CT Head and neck 487
  - CSKPE CT Brain perfusion study 488
  - CSKUH CT Head 489
  - CSKUHC CT Head with contrast 490
  - CSKUC CT Head with contrast 491
  - MAICA MRA Head 492
  - MAICAC MRA Head with contrast 493
  - MBRCC MRI Brain and cervical cord 494
  - MSKPE MRI Head brain perfusion study 495
  - MSKUH MRI Head 496
  - MSKUHC MRI Head with contrast 497
  - MSKUS MRI Head spectroscopy 498
  - MVSKU MRV Cerebral veins 499

**Protocol for scoring neuroimaging studies** 500

**Scoring at scan level** 501

- **negative** - no evidence of any venous sinus thrombosis in the report 502
- **secondary** - evidence of acute or chronic CVT but there is another local pathology contributing such as meningioma, mastoiditis, sinusitis or encephalitis. Systemic factors such as Factor V Leiden deficiency, post-partum state, use of oral contraceptives, or pro-thrombotic drugs are not classified as secondary causes. 503  
504  
505  
506  
Trauma caused by a external event such as traffic accident or assault is classified as a 507

- secondary cause, but history of a fall that could have resulted from a primary brain event is not classified as a secondary cause. 508  
509
- **chronic** - this code is assigned when there is a new presentation but the scan shows evidence of unchanged or resolving thrombosis or recanalising thrombosis. There may or may not be a definitive history of an earlier acute primary event. 510  
511  
512
  - **follow-up** - this code is assigned where the scan shows evidence of thrombosis but has been done as a follow up of a prior event either during the same hospitalisation or later as a routine follow-up. This code was assigned to reports without the primary scan necessarily being available at time of report coding. 513  
514  
515  
516
  - **possible** - this code is used where there is some evidence that may suggest thrombosis but which is not definitive; many such reports will recommend further investigation 517  
518
  - **primary acute** - scan reported as consistent with venous thrombosis, not assigned as chronic and which cannot definitely be assigned to other local cause. 519  
520
  - **no valid result** - there is a report but the report text is missing or the scan was declared to be a technical failure or unreadable 521  
522

### Coding at person level 523

For this process all available scans extracted for an individual were arrayed at person level. 524  
An event encompasses all scans pertaining to a new presentation. A follow up scan done several months or years later is a new event. 525  
526

- **negative** - none of the scans have found evidence of a CVT or an initial scan with possible CVT is followed by a definitive scan such as venogram that rules out CVT 527  
528
- **secondary** - an event where there is evidence of acute or chronic CVT but there is another local brain pathology contributing such as meningioma or mastoiditis or sinusitis or encephalitis 529  
530  
531
- **chronic** - there is a new presentation and one of the scans shows chronic thrombus 532
- **follow-up** - Most events that include follow up scans during that admission will be coded as primary acute events with the date of the event being that of the presentation date of the originating thrombus event. For follow up scans in a separate hospital attendance these are coded as follow up but the event onset date is given as the original primary event date where it is available. Where the primary event is not referred to or given a date the final event code maybe left as follow-up with the date of onset left blank 533  
534  
535  
536  
537  
538  
539
- **possible** - one of the scans for the event found evidence of a possible CVT and no subsequent scan ruled this out or resolved whether or not a thrombus was present 540  
541
- **primary acute** – a new presentation where any scan shows changes consistent with thrombus that is not assigned as chronic and is not attributed to a secondary local cause 542  
543  
544

## Examples of how the protocol is applied

545

1. Patient presents with a seizure – all scans are negative. Two weeks later they present with new onset confusion – CT scan negative, MR venogram shows bleed and CVT . The first admission is coded as negative for each scan and for the event. The second set of scans is coded as negative and primary acute respectively and the event is coded as primary acute. 546  
547  
548  
549  
550
2. Patient presents with confusion and headache after a fall – CT head has no abnormality , subsequent CT venogram shows filling defect in venous sinus – a scan three days later shows similar picture. The reports are coded as negative, primary acute, follow up. The event is coded as primary acute. 551  
552  
553  
554
